# Supplementary material for: Eco-Friendly Water-Processable Polyimide Binders with High Adhesion to Silicon Anodes for Lithium-Ion Batteries
Source: MDPI journal article supplement (doi:10.3390/nano11123164), 2021-11-23
Supplement: s1 [file s1]

## Supporting Information

# Eco-Friendly Water-Processable Polyimide Binders with High Adhesion to Silicon Anodes for Lithium-Ion Batteries

Yujin So <sup>1,2,†</sup>, Hyeon-Su Bae <sup>3,†</sup>, Yi Young Kang <sup>1</sup>, Ji Yun Chung <sup>1,4</sup>, No Kyun Park <sup>1</sup>, Jinsoo Kim <sup>1</sup>, Hee-Tae Jung <sup>2</sup>, Jong Chan Won <sup>1,4,\*</sup>, Myung-Hyun Ryou <sup>3,\*</sup> and Yun Ho Kim <sup>1,4,\*</sup>

<sup>1</sup> Advanced Materials Division, Korea Research Institute of Chemical Technology (KRICT), Daejeon 34114, Korea; soyujin@kRICT.re.kr (Y.S.); yykang@kRICT.re.kr (Y.Y.K.); jjyjy@kRICT.re.kr (J.Y.C.); nkpark@kRICT.re.kr (N.K.P.); jinsoo@kRICT.re.kr (J.K.)

<sup>2</sup> Department of Chemical and Biomolecular Engineering, Korea Advanced Institute of Science and Technology (KAIST), Daejeon 34141, Korea; heetae@kaist.ac.kr

<sup>3</sup> Department of Chemical and Biological Engineering, Hanbat National University, Daejeon 34158, Korea; hsbae1234@gmail.com

<sup>4</sup> Korea Research Institute of Chemical Technology (KRICT) School, University of Science and Technology, Daejeon 34113, Korea

\* Correspondence: jcwon@kRICT.re.kr (J.C.W.); mhryou@hanbat.ac.kr (M.-H.R.); yunho@kRICT.re.kr (Y.H.K.); Tel.: +82-860-7294 (J.C.W.); +82-42-821-1534 (M.-H.R.); +82-42-860-7274 (Y.H.K.)

† These authors contributed equally to this work.

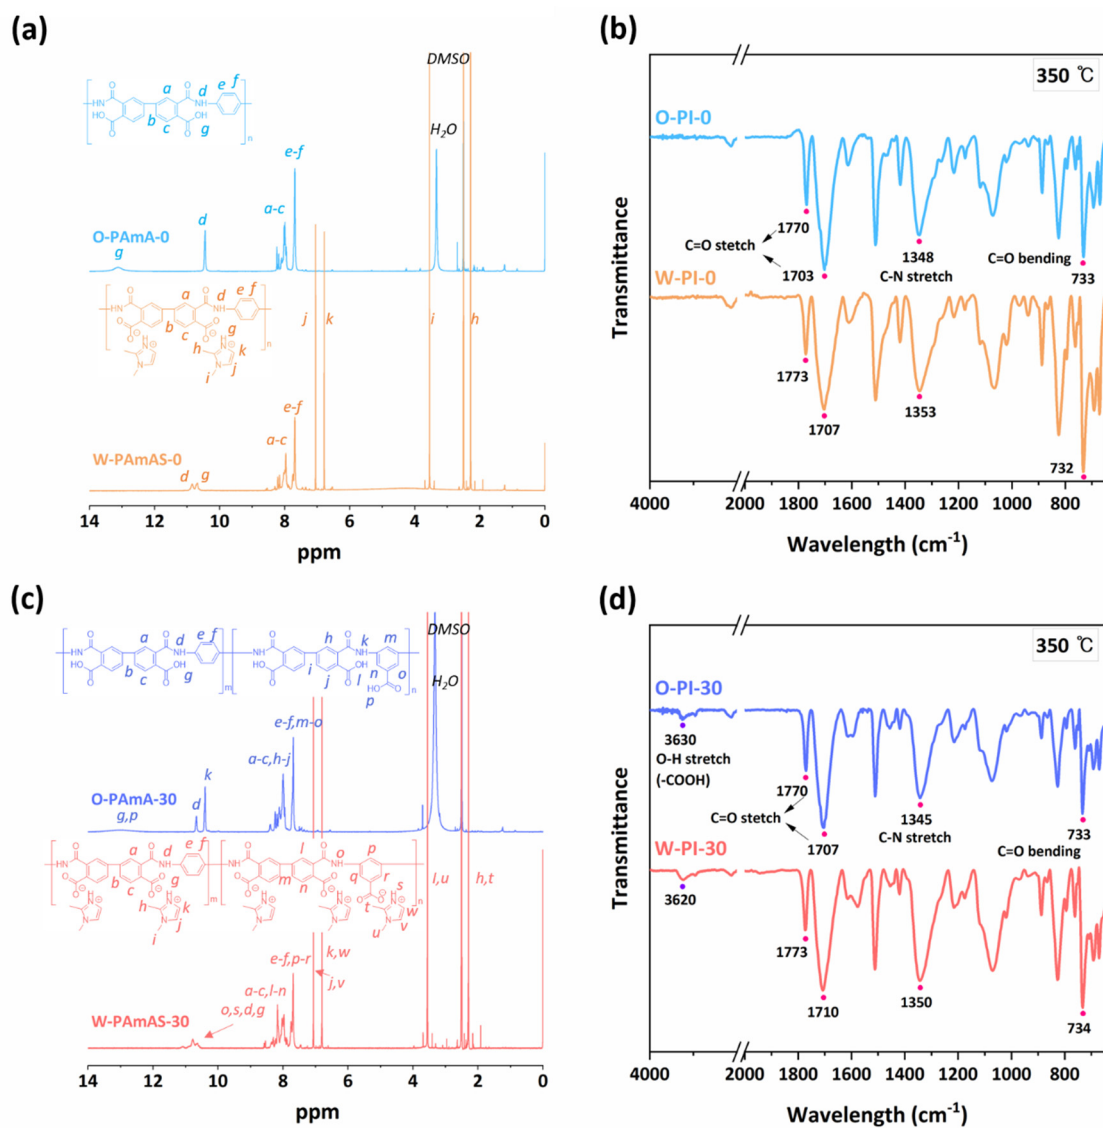

**Figure S1.** <sup>1</sup>H NMR spectra of (a) O-PAmA-0 and W-PAmA-0 and (c) O-PAmA-30 and W-PAmA-30 in DMSO-d<sub>6</sub>. FT-IR spectra (b) O-PI-0 and W-PI-0 and (d) O-PI-30 and W-PI-30 after imidization at 350 °C.

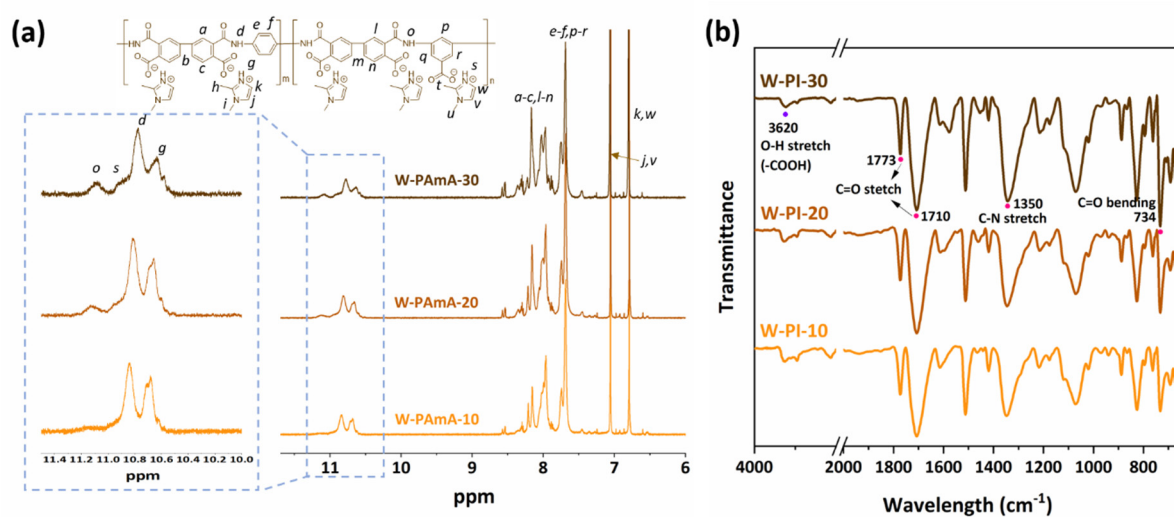

**Figure S2.** (a)  $^1\text{H}$  NMR spectra of W-PAmAS-# and (b) FT-IR spectra of W-PI-# in proportion to the DABA content.

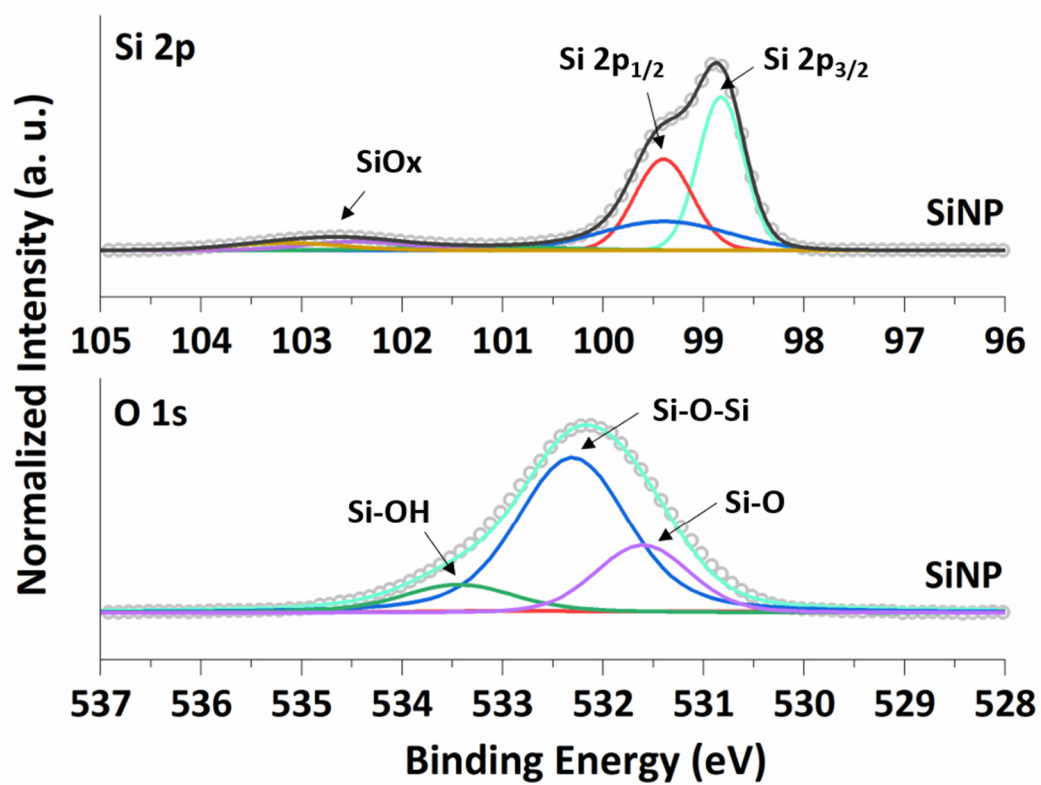

Figure S3. XPS spectra of Si 2p and O 1s in SiNPs.

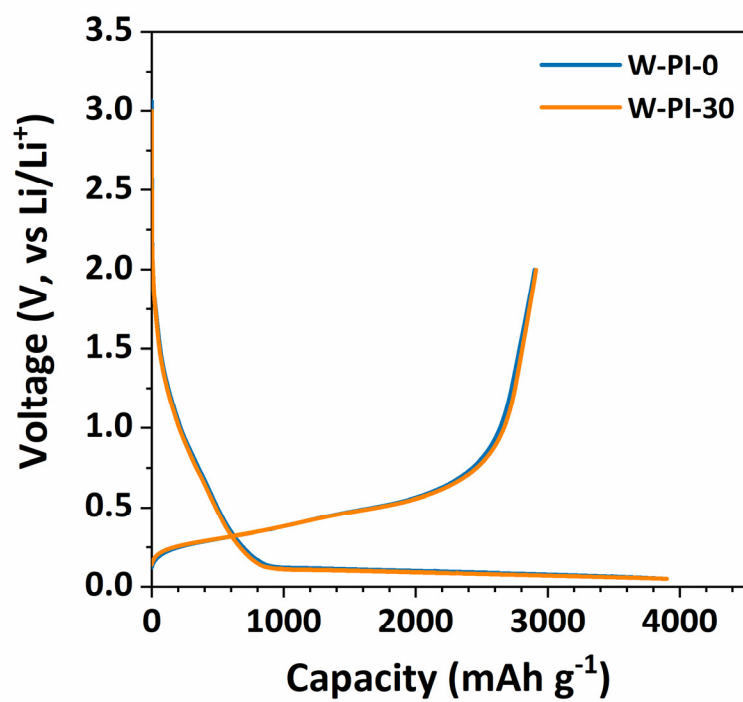

**Figure S4.** Precycling curves of Si anodes with W-PI binders (0.005–2.0 V vs. Li/Li<sup>+</sup>, 200 mA g<sup>-1</sup> at 25 °C).

**Table S1.** Cycle performance of Si-based anodes with different polymer binders

| Binder                             | Anode material | Specific Capacity<br>(mAh g <sup>-1</sup> ) | Retention<br>(%)                                         | Current rate                      | Content of binder<br>(%) | Ref. |
|------------------------------------|----------------|---------------------------------------------|----------------------------------------------------------|-----------------------------------|--------------------------|------|
| <i>Our polyimide<br/>(W-PI-30)</i> | <i>Nano-Si</i> | <i>2061</i>                                 | <i>1883 mAh g<sup>-1</sup> (91.3 %)<br/>(200 cycles)</i> | <i>1200 mA g<sup>-1</sup></i>     | <i>20</i>                | -    |
| Carboxymethyl<br>chitosan          | Si             | 1990                                        | 950 mAh g <sup>-1</sup><br>(50 cycles)                   | 500 mA g <sup>-1</sup>            | 8                        | [22] |
| PVA-PEI                            | Nano-Si        | 3072.9                                      | 1063 mAh g <sup>-1</sup><br>(300 cycles)                 | 1 A g <sup>-1</sup>               | 20                       | [23] |
| PAA-PANI                           | Nano-Si        | 1979                                        | 56.5 %<br>(300 cycles)                                   | 1.0 C                             | 25                       | [24] |
| PPyMAA                             | Nano-Si        | 3928.8                                      | 2200 mAh g <sup>-1</sup><br>(over 180 cycles)            | 420 mA g <sup>-1</sup><br>(0.1 C) | 10                       | [25] |
| Gum arabic<br>(GA)                 | Nano-Si        | 4056                                        | 2708 mAh g <sup>-1</sup> (75.7%)<br>(100 cycles)         | 420 mA g <sup>-1</sup><br>(0.1 C) | 25                       | [26] |
| Polyimide                          | Si             | ~800<br>(after 2 <sup>nd</sup> cycle)       | 800 mAh g <sup>-1</sup><br>(195 cycles)                  | 800 mA g <sup>-1</sup>            | 15                       | [41] |
| Polyimide                          | Si             | 2077                                        | 75.9 %<br>(20 cycles)                                    | 200 mA g <sup>-1</sup>            | 10                       | [42] |
| Polyimide                          | Si             | 1195.6                                      | 93.6 %<br>(30 cycles)                                    | 0.1 C                             | 25                       | [43] |
| Copolyimide<br>(P84)               | Si             | 1929                                        | 1313 mAh g <sup>-1</sup><br>(300 cycles)                 | 1.2 A g <sup>-1</sup>             | 20                       | [4]  |
| Copolyimide<br>(PI-200)            | Si             | 2989.7                                      | 2235.5 mAh g <sup>-1</sup><br>(200 cycles)               | 420 mA g <sup>-1</sup><br>(0.1 C) | 20                       | [44] |
| Polyamide imide<br>(PAI)           | Nano-Si        | ~2000                                       | 1700 mAh g <sup>-1</sup><br>(20 cycles)                  | 0.56 mA cm <sup>-2</sup>          | 10                       | [45] |
